# Supplementary material for: CrSe2/Ti3C2 MXene 2D/2D hybrids as promising candidates for energy storage applications
Source: Royal Society of Chemistry journal article supplement (doi:10.1039/d2se01122k), 2022-01-01
Supplement: d2se01122k1.pdf [file d2se01122k1.pdf]

## Supporting Information

# CrSe<sub>2</sub>/Ti<sub>3</sub>C<sub>2</sub> MXene 2D/2D Hybrids as a Promising Candidate for Energy Storage Applications

Sree Raj K A,<sup>1</sup> Narad Barman<sup>2</sup>, Namsheer K<sup>1</sup>, Ranjit Thapa<sup>2</sup> and Chandra Sekhar Rout<sup>\*,1</sup>

<sup>a</sup> Centre for Nano and Material Science, Jain University, Jain global campus, Jakkasandra, Ramanagaram, Bangalore - 562112, India.

<sup>b</sup> Department of Physics, SRM University – AP, Amaravati 522 240, Andhra Pradesh, India.

\*Corresponding author: [csrout@gmail.com](mailto:csrout@gmail.com), [r.chandrasekhar@jainuniversity.ac.in](mailto:r.chandrasekhar@jainuniversity.ac.in) (CSR);

## S1. Calculations

Three electrode configuration-

Areal capacitance ( $C_{Areal}$ ) from cyclic voltammetry;

$$C_{Areal} = \frac{\text{Area of CV curve}}{2 * s * \nu * \Delta V} \quad (S1)$$

Where, s is the active area of the electrode,  $\nu$  is the scan rate and  $\Delta V$  is the potential window.

Areal capacitance ( $C_{Areal}$ ) from galvanostatic charge discharge;

$$C_{Areal} = \frac{i * \Delta t}{s * \Delta V} \quad (S2)$$

Where, i is the applied current,  $\Delta t$  is the discharge time.

Areal capacitance ( $C_{Areal}$ ) of ASSS from galvanostatic charge discharge;

$$C_{Areal} = \frac{i * \Delta t}{s * \Delta V} \quad (S3)$$

Energy density of ASSS;

$$E_D = \frac{1}{2} CV^2 \quad (S4)$$

Where, C is areal capacitance of ASC, V is the working window of ASC.

Power density of ASSS:

$$P_D = \frac{E_D}{\Delta t} \quad (S5)$$

## S2. Supporting Figures

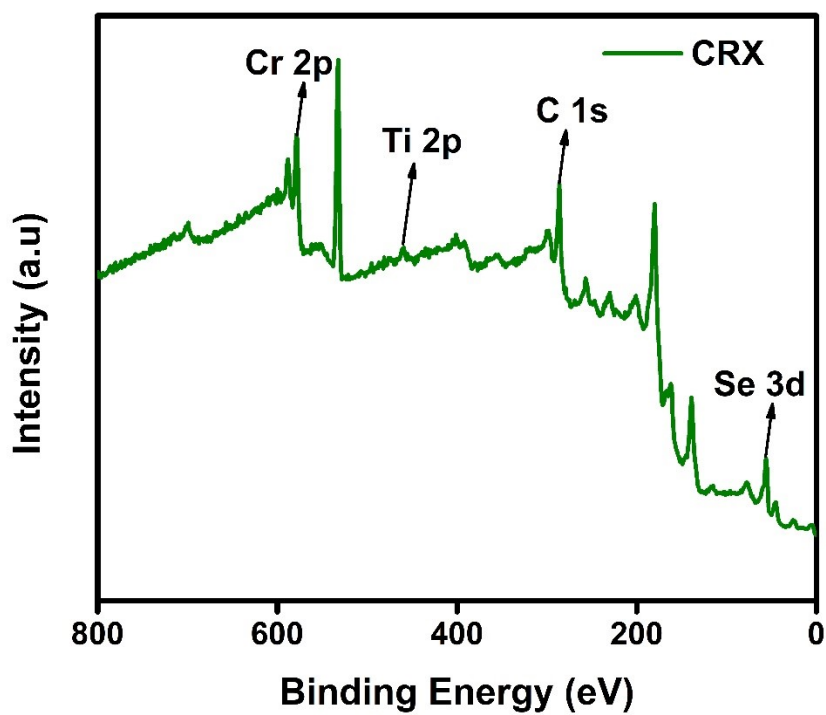

Figure S1: XPS survey spectra of CRX.

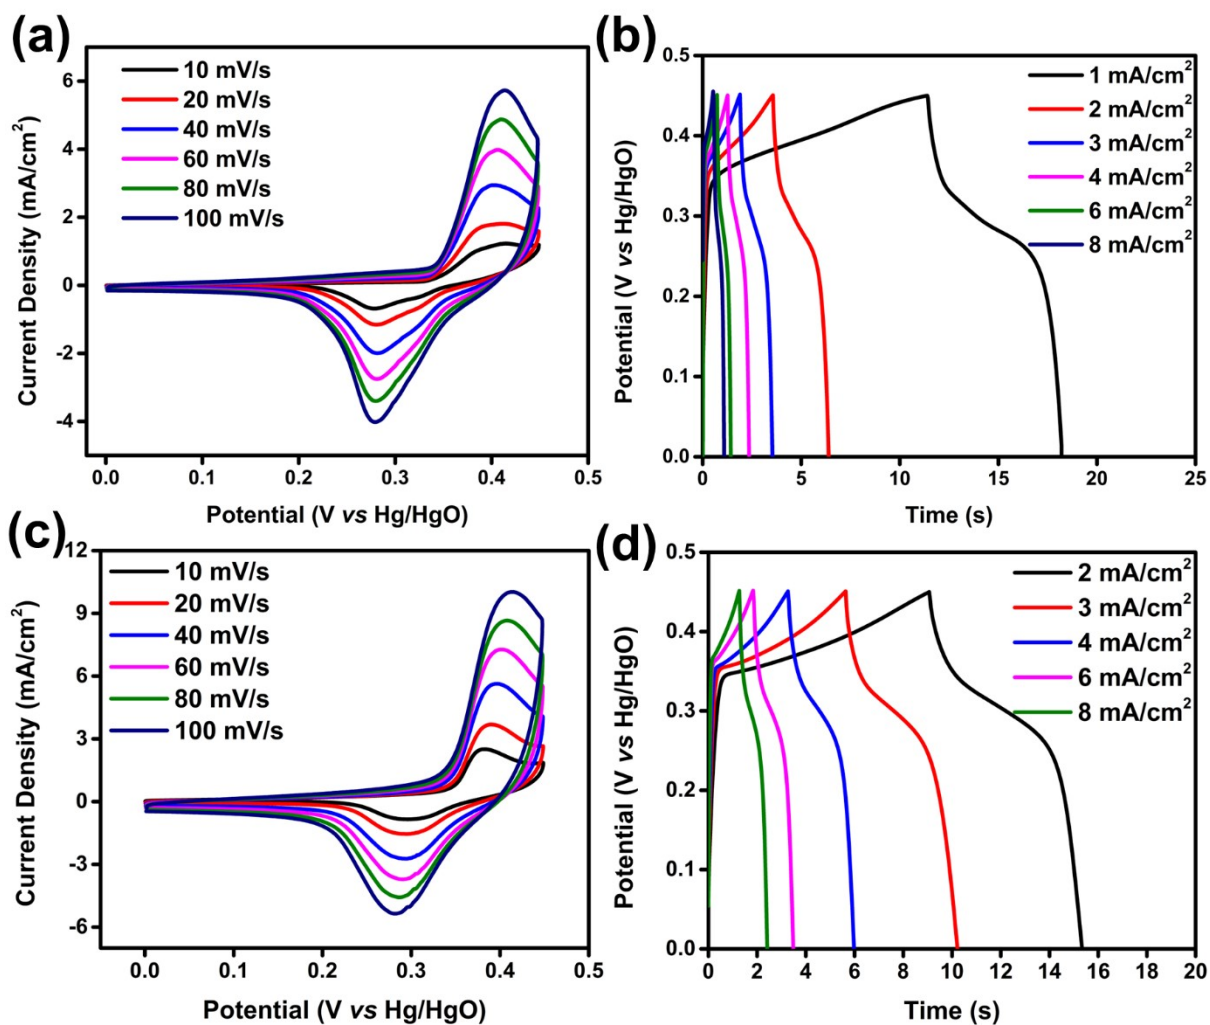

**Figure S2:** Three electrode analysis of CrSe<sub>2</sub> and MXene electrodes in 3M KOH. (a) CV profile and (b) GCD profile of CrSe<sub>2</sub> electrode, (c) CV profile and GCD profile of MXene electrode.

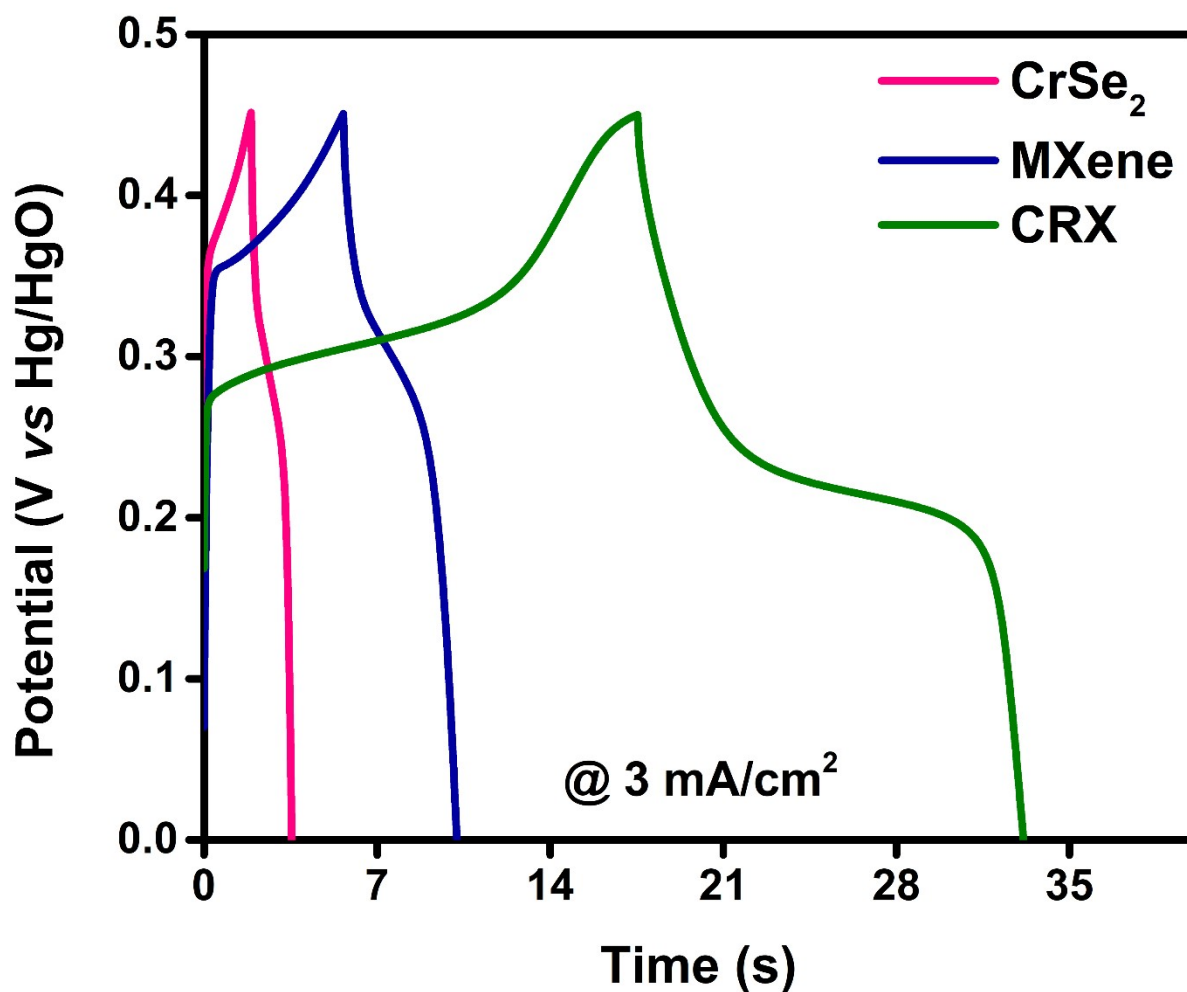

**Figure S3:** Comparative GCD performance of CrSe<sub>2</sub>, MXene and CRX electrodes at current density of 3 mA/cm<sup>2</sup>.

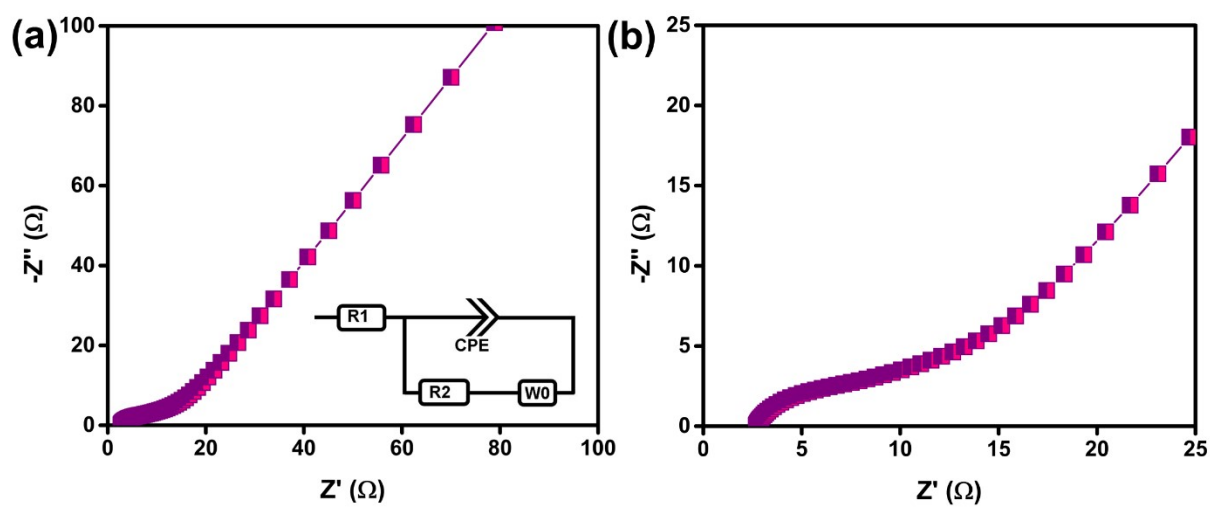

**Figure S4:** (a, b) Nyquist plot of the ASSS.

**Table S1**

| <b>Electrode</b>                                                  | <b>Electrolyte</b>                 | <b>Energy Density and Power Density</b>                                                       | <b>Cyclic Stability</b>  | <b>Ref</b>    |
|-------------------------------------------------------------------|------------------------------------|-----------------------------------------------------------------------------------------------|--------------------------|---------------|
| PEDOT-GO/U-C                                                      | PVA/H <sub>3</sub> PO <sub>4</sub> | 2.2 $\mu\text{Wh}/\text{cm}^2$ at 200 $\mu\text{W}/\text{cm}^2$                               | 89% (1000 cycles)        | <sup>1</sup>  |
| Ti@MnO <sub>2</sub> PDWS                                          | PVA/LiCl                           | 1.4 $\mu\text{Wh}/\text{cm}^2$ at 580 $\mu\text{W}/\text{cm}^2$                               | 88% (3500 cycles)        | <sup>2</sup>  |
| CF/MnO <sub>2</sub> //CF/MoO <sub>3</sub><br>(asymmetric)         | PVA/KOH                            | 2.7 $\mu\text{Wh}/\text{cm}^2$ at 530 $\mu\text{W}/\text{cm}^2$                               | 89% (3000 cycles)        | <sup>3</sup>  |
| rGO-Ni-yarn                                                       | PVA/H <sub>3</sub> PO <sub>4</sub> | 1.6 $\mu\text{Wh}/\text{cm}^2$                                                                | 96% (10000 cycles)       | <sup>4</sup>  |
| 3D graphene                                                       | PVA/H <sub>2</sub> SO <sub>4</sub> | 2.4 $\mu\text{Wh}/\text{cm}^2$ at 25 $\mu\text{W}/\text{cm}^2$                                |                          | <sup>5</sup>  |
| Ti <sub>3</sub> C <sub>2</sub> MXene                              | PVA/KOH                            | 1.25 $\mu\text{Wh}/\text{cm}^2$                                                               | 92% (10000 cycles)       | <sup>6</sup>  |
| Graphene Film                                                     | PVA/H <sub>2</sub> SO <sub>4</sub> | 0.0028 $\mu\text{Wh}/\text{cm}^2$ and 2 $\mu\text{W}/\text{cm}^2$                             | 98% (10000 cycles)       | <sup>7</sup>  |
| PANI-ZIF-67-CC                                                    | PVA/H <sub>3</sub> PO <sub>4</sub> | 4.4 $\mu\text{Wh}/\text{cm}^2$                                                                | 80% (2000 cycles)        | <sup>8</sup>  |
| MoS <sub>2</sub> @Ni-mesh//MnO <sub>2</sub> @Ni-mesh (Asymmetric) | PVA-LiCl                           | 0.86 $\mu\text{Wh}/\text{cm}^2$ at 16 $\mu\text{W}/\text{cm}^2$                               | 88% (10000 cycles)       | <sup>9</sup>  |
| Cu@Ni@NiCoS                                                       | PVA-KOH                            | 0.48 $\mu\text{Wh}/\text{cm}^2$ at 11.15 $\mu\text{W}/\text{cm}^2$                            | 92% (10000 cycles)       | <sup>10</sup> |
| <b>CrSe<sub>2</sub>/Ti<sub>3</sub>C<sub>2</sub></b>               | <b>PVA/KOH</b>                     | <b>7.11 <math>\mu\text{Wh}/\text{cm}^2</math> at 355 <math>\mu\text{W}/\text{cm}^2</math></b> | <b>82% (5000 cycles)</b> | <b>This</b>   |

| MXene |  | $\mu\text{W}/\text{cm}^2$ | (cycles) | Work |
|-------|--|---------------------------|----------|------|
|-------|--|---------------------------|----------|------|

## Supporting References

- 1 D. Fu, H. Zhou, X. M. Zhang, G. Han, Y. Chang and H. Li, *ChemistrySelect*, 2016, **1**, 285–289.
- 2 K. Guo, Y. Ma, H. Li and T. Zhai, *Small*, 2016, **12**, 1024–1033.
- 3 J. Noh, C. M. Yoon, Y. K. Kim and J. Jang, *Carbon N. Y.*, 2017, **116**, 470–478.
- 4 X. Pu, L. Li, M. Liu, C. Jiang, C. Du, Z. Zhao, W. Hu and Z. L. Wang, *Adv. Mater.*, 2016, **28**, 98–105.
- 5 A. Ramadoss, K. Y. Yoon, M. J. Kwak, S. I. Kim, S. T. Ryu and J. H. Jang, *J. Power Sources*, 2017, **337**, 159–165.
- 6 S. Xu, Y. Dall’Agnese, G. Wei, C. Zhang, Y. Gogotsi and W. Han, *Nano Energy*, 2018, **50**, 479–488.
- 7 P. Xu, J. Kang, J. B. Choi, J. Suhr, J. Yu, F. Li, J. H. Byun, B. S. Kim and T. W. Chou, *ACS Nano*, 2014, **8**, 9437–9445.
- 8 L. Wang, X. Feng, L. Ren, Q. Piao, J. Zhong, Y. Wang, H. Li, Y. Chen and B. Wang, *J. Am. Chem. Soc.*, 2015, **137**, 4920–4923.
- 9 B. S. Soram, J. Y. Dai, I. S. Thangjam, N. H. Kim and J. H. Lee, *J. Mater. Chem. A*, 2020, **8**, 24040–24052.
- 10 B. S. Soram, I. S. Thangjam, J. Y. Dai, T. Kshetri, N. H. Kim and J. H. Lee, *Chem. Eng. J.*, 2020, **395**, 125019.
